# Supplementary material
Source: publisher figshare collection journal article supplement (https://acs.figshare.com/ndownloader/files/3727489)
Supplement: Supplementary file 1 [file 3727489]

# Supporting Information for: Force Field-Induced Bias in the Structure of A $\beta$ <sub>21-30</sub>: A Comparison of OPLS, AMBER, CHARMM, and GROMOS Force-Fields

Micholas Dean Smith<sup>a,†</sup>, J. Srinivasa Rao<sup>a,b</sup>, Elizabeth Segelken<sup>a</sup>, and Luis Cruz<sup>a\*</sup>

<sup>a</sup> Department of Physics, Drexel University, Philadelphia, PA, 19104 USA.

<sup>b</sup> Department of Physics, New Jersey Institute of Technology, University Heights, Newark, NJ, 07102-1982 USA

<sup>†</sup> Current Address: Center for Molecular Biophysics, University of Tennessee/Oak Ridge National Laboratory, Oak Ridge, TN, 37830-6309 USA

## Organization and layout of this section.

This section contains tables and figures that supplement the computational methods and conclusions contained in the main text. These tables and figures are discussed in and are directly referenced from the main text. For this reason, they are only presented below with respective table and figure captions, but without further discussion.

**\*Corresponding Author: Luis Cruz**

Email: ccruz@drexel.edu

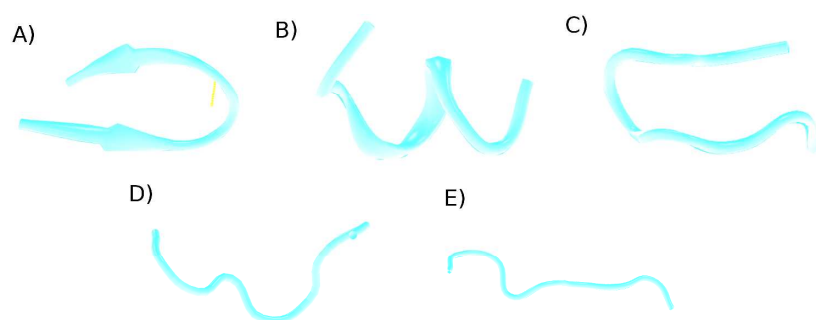

Figure S1) Sample representations of secondary structures. A)  $\beta$ , B) Helix, C) Bridge, D) Turn, E) Coil

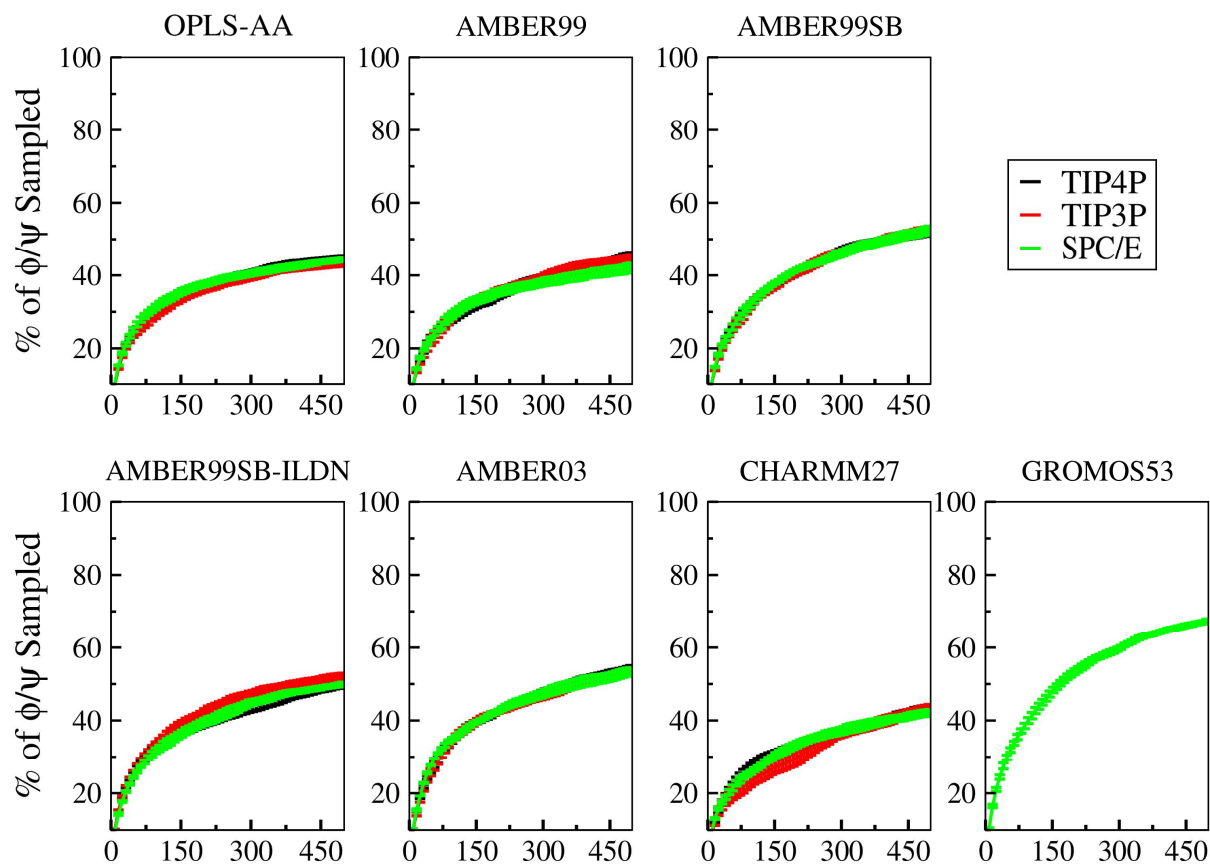

Figure S2. Average percentage of Ramachandran space sampled as a function of simulation time. Error bars are standard error of the mean. As simulation approaches convergence, the percentage of Ramachandran space sampled approaches an asymptote.

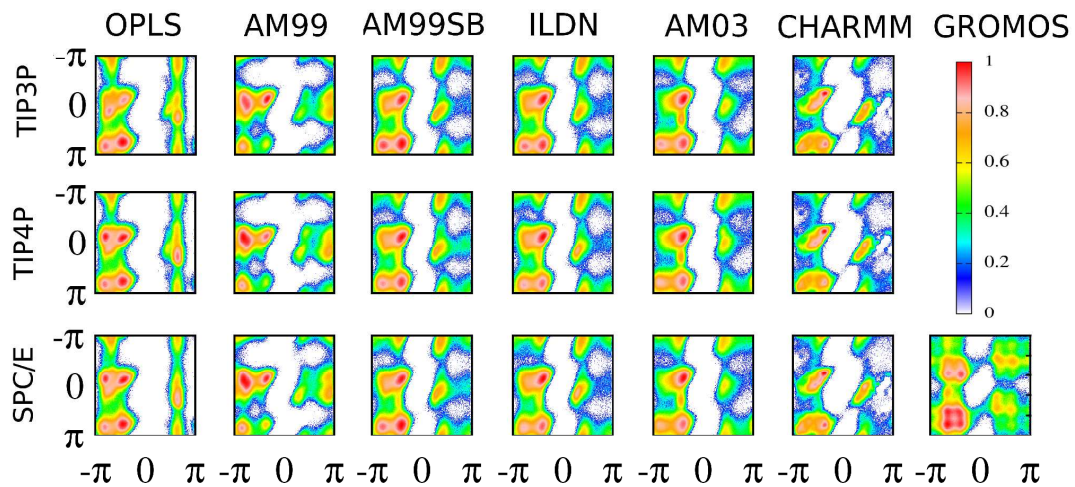

Figure S3) Composite (all frames from all trajectories of noted force-field/water model choice) Ramachandran Spaces.

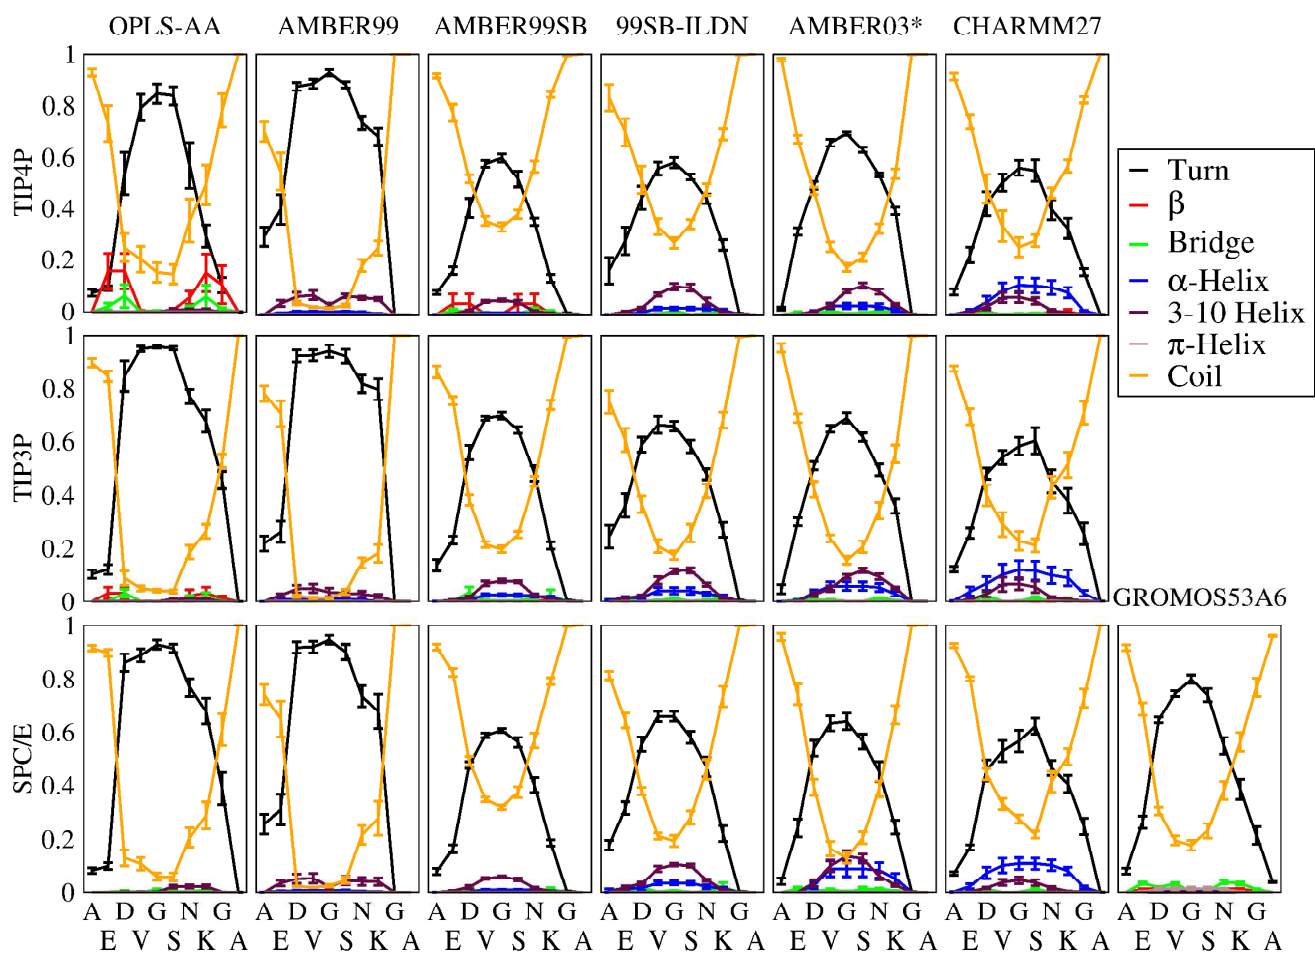

Figure S4. Average secondary structure propensities per amino acid. Error bars are standard error of the mean.

| OPLS-AA  |    |                                        |             |             | AMBER 99SB-ILDN |                                         |             |             |
|----------|----|----------------------------------------|-------------|-------------|-----------------|-----------------------------------------|-------------|-------------|
| Name     |    | Description                            | Sigma       | Epsilon     | Name            | Description                             | Sigma       | Epsilon     |
| opls_235 | C  | C=O in amide                           | 3.75000e-01 | 4.39320e-01 | C               | Carbon in carbonyl group                | 3.9967e-01  | 3.59824e-01 |
| opls_135 | CT | Alkane carbon                          | 3.50000e-01 | 2.76144e-01 | CT              | Aliphatic carbon                        | 3.9967e-01  | 4.57730e-01 |
| opls_240 | H  | H on N in primary amide                | 0.00000e+00 | 0.00000e+00 | H               | Hydrogen bonded to nitrogen atoms       | 1.06908e-01 | 6.56888e-02 |
| opls_140 | HC | Alkane hydrogen                        | 2.50000e-01 | 1.25520e-01 | HC              | Aliphatic hydrogen bonded to carbon     | 2.64953e-01 | 6.56888e-02 |
| opls_155 | HO | Hydrogen in mono alcohols              | 0.00000e+00 | 0.00000e+00 | HO              | Hydrogen in hydroxyl group              | 0.00000e+00 | 0.00000e+00 |
| opls_236 | O  | C=O in amide                           | 2.96000e-01 | 8.78640e-01 | O               | Oxygen in carbonyl group                | 2.95992e-01 | 8.78640e-01 |
| opls_272 | O2 | O in COO-carboxylate, peptide terminus | 2.96E-001   | 8.78640E-01 | O2              | Oxygen in carboxyl and phosphate groups | 2.95992e-01 | 8.78640E-01 |
| opls_154 | OH | Oxygen in mono alcohols                | 3.12000e-01 | 7.11280e-01 | OH              | Oxygen in hydroxyl group                | 3.06647e-01 | 8.80314e-01 |
| opls_790 | OW | Oxygen in TIP4P Water                  | 3.21500e-01 | 5.85760e-01 | OW_tip4p        | Oxygen in TIP4P Water                   | 3.15365e-01 | 6.48520e-01 |

Table S1. Table that lists the OPLS-AA parameters with their original values (on the lhs) that were replaced with the AMBER99SB-ILDN parameters (on the rhs). This modified OPLS-AA force field was used to investigate the origin of the differences found between these two force fields in the structural properties of the decapeptide.

**Table S2. Results on the secondary structure found using the modified OPLS-AA force field with the AMBER99SB-ILDN non-bonded parameters. Due to rounding error, some of the percentages may not add to 100%.**

|              | <b>Average Percentages (%) for the five trajectories</b> | <b>Standard Error of the Mean</b> |
|--------------|----------------------------------------------------------|-----------------------------------|
| <b>Turn</b>  | 51.2                                                     | 5.8                               |
| <b>Beta</b>  | 0.2                                                      | 0.1                               |
| <b>Coil</b>  | 1.7                                                      | 0.5                               |
| <b>Helix</b> | 46.8                                                     | 6.1                               |

**Table S3. Results on the secondary structure found using the modified AMBER99SB-ILDN force field with the OPLS-AA non-bonded parameters. Due to rounding error, some of the percentages may not add to 100%.**

|                    | <b>Average Percentages (%) for the ten trajectories</b> | <b>Standard Error of the Mean</b> |
|--------------------|---------------------------------------------------------|-----------------------------------|
| <b>Turn</b>        | 57.9                                                    | 1.6                               |
| <b>Beta/Bridge</b> | 4.96                                                    | 3                                 |
| <b>Coil</b>        | 34.3                                                    | 2.3                               |
| <b>Helix</b>       | 13.3                                                    | 1.7                               |



### Cystine Dimer water-vacu energy comparisons:

Methodology: Two dimers of Cystine (two sets of Cystine dimers) separated by ~0.35nm were simulated for 5ns in the NPT (~1atm, 303K) ensemble with restraints to hold the center of mass distance between the two dimers roughly constant. This was performed for each force-field with the cystine dimers solvated in TIP3P water (except GROMOS where SPC/E was used) and *in vacu*. The same bond constraints used in the main text are also used here, along with a 2fs integration timestep. Absolute relative differences (unit-less ratio of changes to the energies) to the short-range lennard-jones and electrostatic interactions between the Cystine dimers from switching from *in vacu* conditions to aqueous conditions are reported in table S4 below.

| Force-field      | LJ (SR)        | Electrostatic (SR) |
|------------------|----------------|--------------------|
| OPLS-AA          | 0.444 (0.095)  | 0.156 (0.0709)     |
| AMBER99          | 1.547 (0.033)  | 8.783 (0.208)      |
| AMBER99SB        | 1.641 (0.0566) | 1.533 (0.703)      |
| AMBER99SBILDN    | 1.629 (0.050)  | 1.371 (0.492)      |
| AMBER03          | 1.467 (0.152)  | 0.824 (0.52)       |
| CHARMM22/27-CMAP | 0.321 (0.117)  | 0.323 (0.056)      |
| GROMOS53A6       | 0.5198 (0.048) | 0.749 (0.0323)     |

Table S4) Absolute relative differences of non-bonded terms of two cystine dimers. Comparison is made between *in vacu* and aqueous solution (changes are relative to vacuum energies). Standard deviations are reported in parenthesis.
